# Supplementary material for: Treatment with Cannabinoids as a Promising Approach for Impairing Fibroblast Activation and Prostate Cancer Progression
Source: PubMed Central journal article supplement (PMC7037293; doi:10.3390/ijms21030787), 2020-01-25

Figure S1

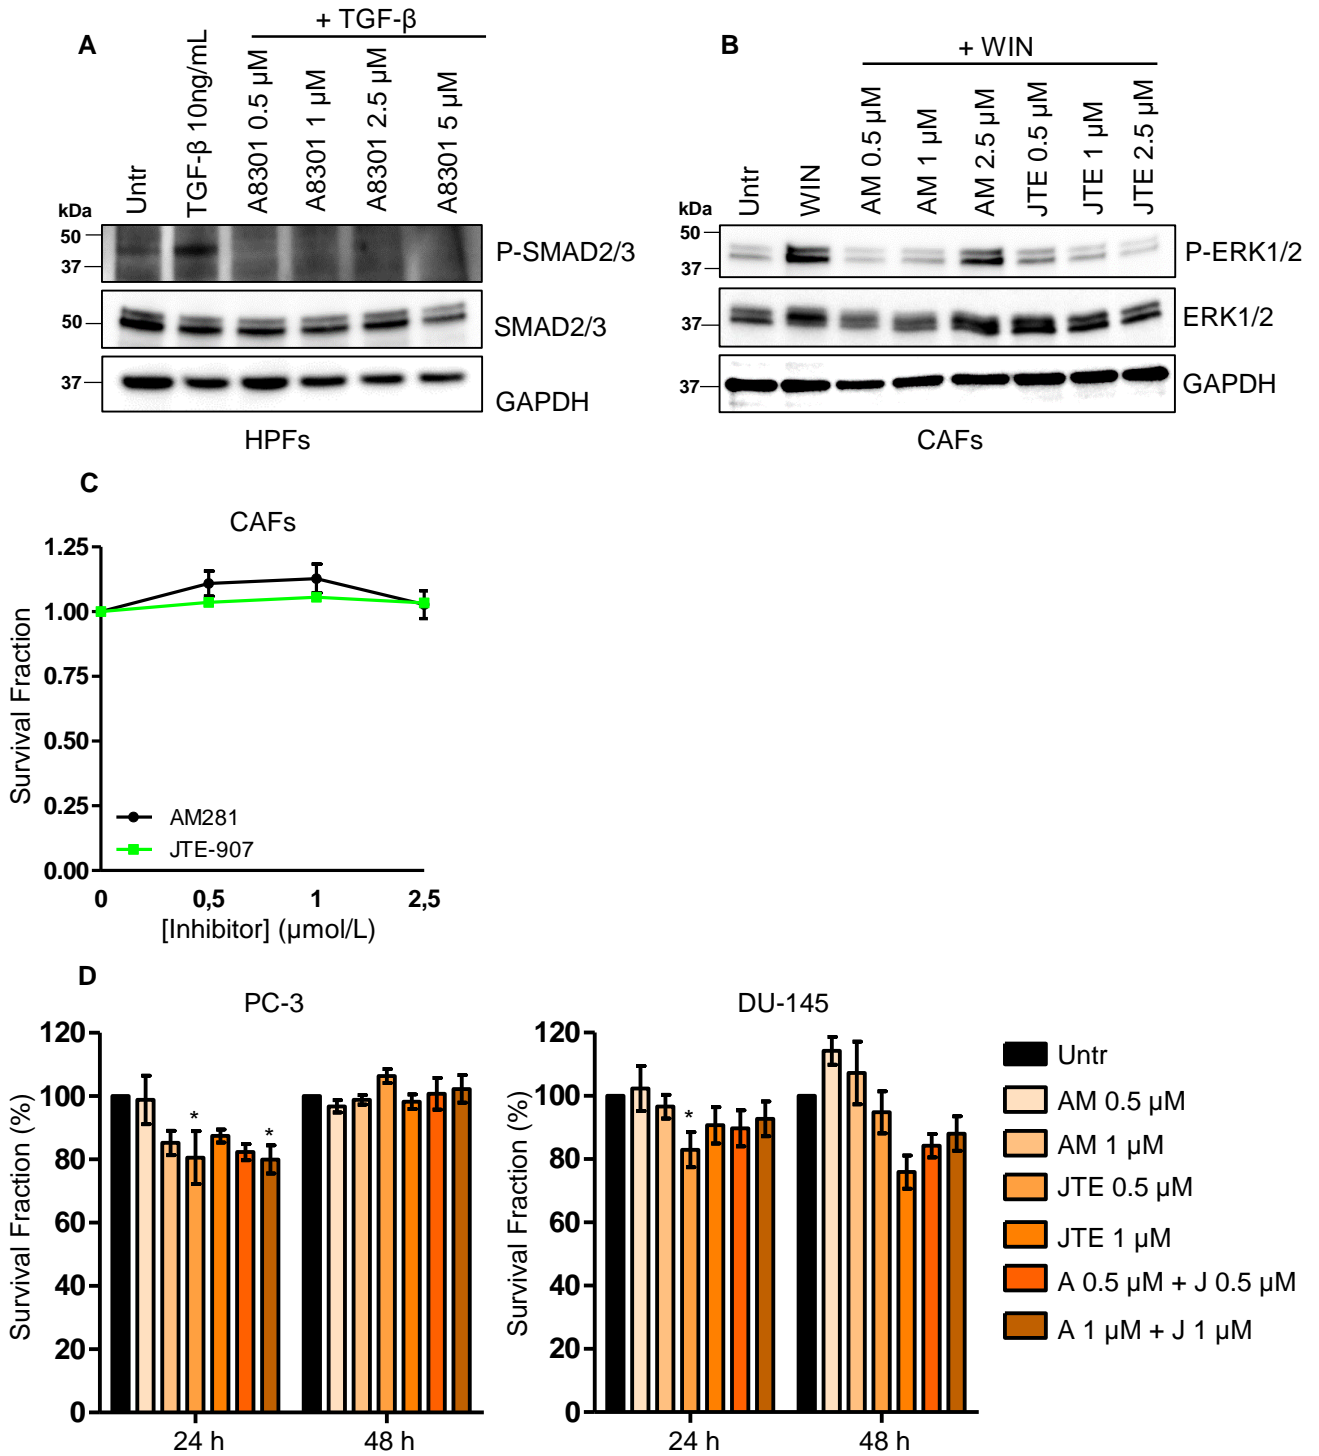

Supplement: ijms-21-00787-s001.pdf [file ijms-21-00787-s001.pdf]
